# Supplementary material for: Visualizing ultrasmall silica–CTAB hybrid nanoparticles for generating high photoluminescence
Source: Royal Society of Chemistry journal article supplement (doi:10.1039/d0tc00797h), 2020-01-01
Supplement: d0tc00797h1.pdf [file d0tc00797h1.pdf]

# Visualizing Ultrasmall Silica-CTAB Hybrid Nanoparticle for Generating High Photoluminescence

Yongju He<sup>1</sup>, Chuan-Cun Shu<sup>2\*</sup>, Yu Guo<sup>3</sup>, Mengqiu Long<sup>2\*</sup>, Hui Xu<sup>2</sup>

<sup>1</sup> School of Material Science and Engineering, Central South University, Changsha, Hunan 410083, China

<sup>2</sup> Institute of Super-microstructure and Ultrafast Process in Advanced Materials, School of Physics and Electronics, Central South University, Changsha, Hunan 410083, China

<sup>3</sup> Hunan Provincial Key Laboratory of Flexible Electronic Materials Genome Engineering, School of Physics and Electronic Science, Changsha University of Science and Technology, Changsha 410114, China

Corresponding authors (\*): [cc.shu@csu.edu.cn](mailto:cc.shu@csu.edu.cn) & [mqlong@csu.edu.cn](mailto:mqlong@csu.edu.cn)

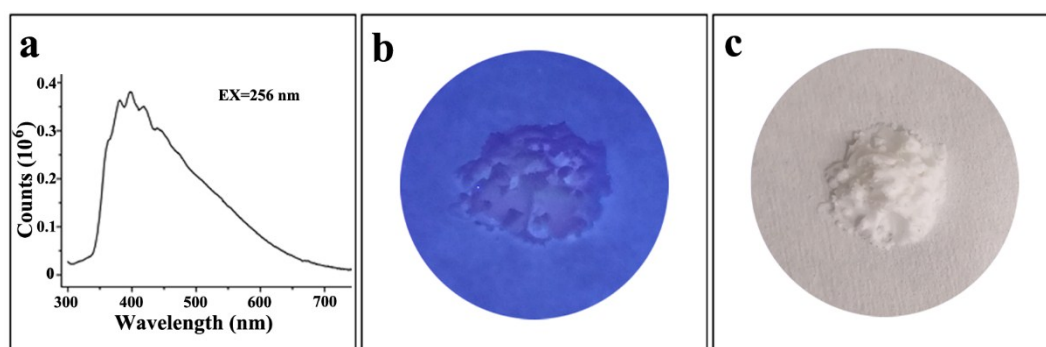

**Figure S1** (a) Photoluminescence emission spectra of SCHN under 256 nm excitation, photographs of SCHN-12 in their solid state under (b) 256 nm UV lamp and (c) day light.

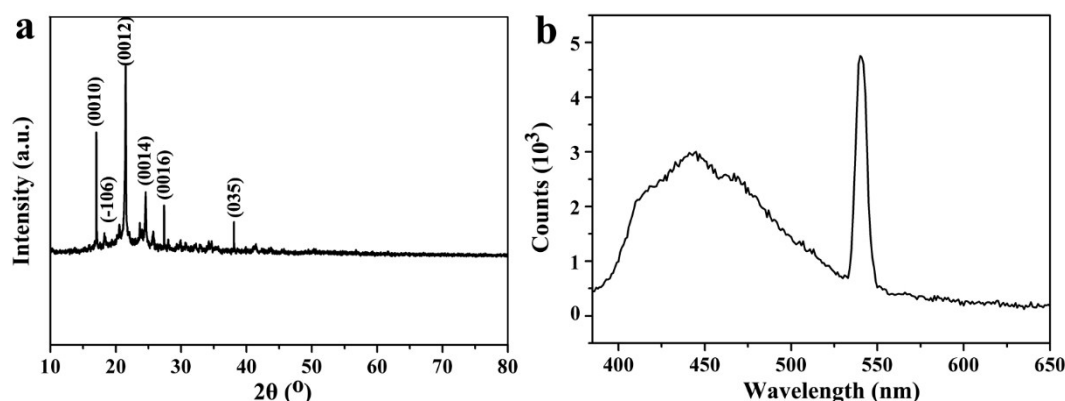

**Figure S2** (a) The powder XRD patterns of the partial CTAB-removing SCHN-12, (b) photoluminescence emission spectra of the partial CTAB-removing SCHN-12 under 365 nm excitation.

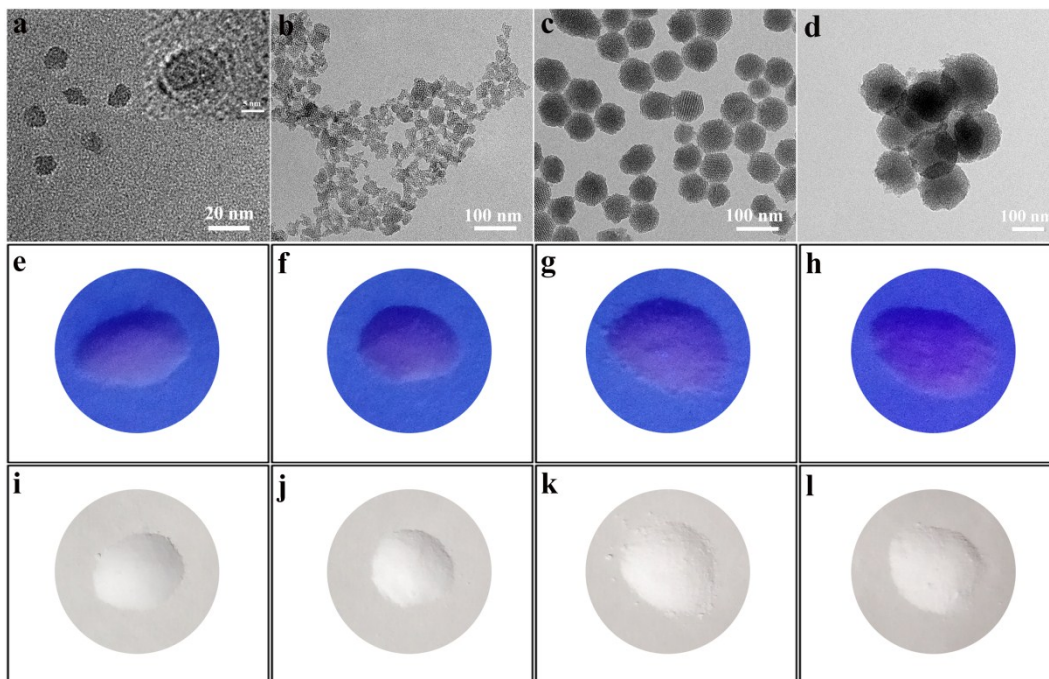

**Figure S3** TEM images and photographs of PSN with different particle sizes. TEM images of (a) PSN-12, (b) PSN-23, (c) PSN-80 and (d) PSN-150. (b) Photographs of (e, i) PSN-12, (f, j) PSN-23, (g, k) PSN-80 and (h, l) PSN-150 in their solid state under 365 nm UV lamp (upper) and day light (down).

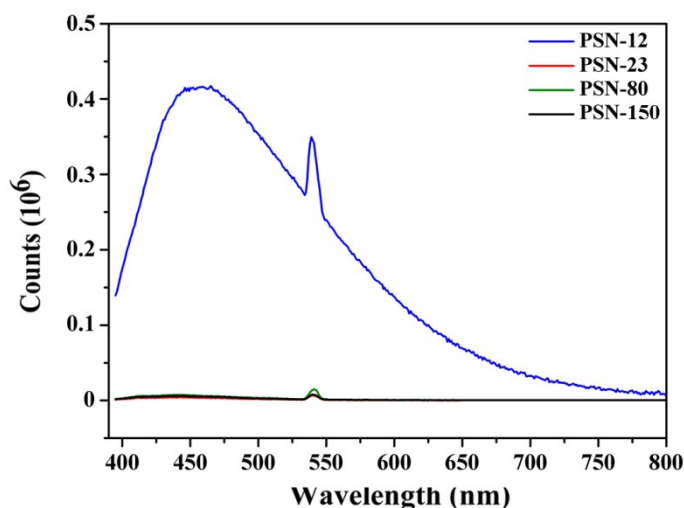

**Figure S4** Photoluminescence emission spectra of PSN-12, PSN-23, PSN-80 and PSN-150 under 365 nm excitation.

**Table S1** The hydrodynamic particle sizes of SCHN samples.

| Sample   | Size (nm) | PDI         |
|----------|-----------|-------------|
| SCHN-12  | 14.1±1.2  | 0.128±0.029 |
| SCHN-23  | 26.7±2.9  | 0.198±0.013 |
| SCHN-80  | 95.6±3.2  | 0.208±0.035 |
| SCHN-150 | 180.3±8.6 | 0.226±0.020 |

**Table S2** The hydrodynamic particle sizes of PSN samples.

| Sample  | Size (nm) | PDI         |
|---------|-----------|-------------|
| PSN-12  | 13.9±2.2  | 0.134±0.022 |
| PSN-23  | 26.4±6.1  | 0.181±0.006 |
| PSN-80  | 91.9±3.7  | 0.239±0.018 |
| PSN-150 | 175.2±4.9 | 0.242±0.027 |

**Table S3** The quantum yields of PSN with different particle sizes.

| Sample        | PSN-12 | PSN-23 | PSN-80 | PSN-150 |
|---------------|--------|--------|--------|---------|
| Quantum yield | 1.03 % | 1.07 % | 1.38 % | 0.93 %  |

**Table S4** The fluorescence lifetimes of SCHN with different particle sizes.

| Sample   | Fluorescence lifetimes |          |
|----------|------------------------|----------|
|          | $\tau_1$               | $\tau_2$ |
| SCHN-12  | 1.14                   | 9.18     |
| SCHN-23  | 1.15                   | 9.26     |
| SCHN-80  | 1.07                   | 9.37     |
| SCHN-150 | 1.15                   | 9.47     |

## Theoretical model

We consider two different two-state molecules  $|S_{c0}\rangle$  and  $|S_{c1}\rangle$  with a transition frequency  $\omega_1$  for CTAB, and  $|S_{p0}\rangle$  and  $|S_{p1}\rangle$  with a transition frequency  $\omega_2$  for PSN, and the two molecules are coupled through the dipole-dipole interaction in a strength of  $\beta$ . A four-state quantum system is formed with states  $|S_{c0}S_{p0}\rangle$ ,  $|S_{c0}S_{p1}\rangle$ ,  $|S_{c1}S_{p0}\rangle$ , and  $|S_{c1}S_{p1}\rangle$ , and the Hamiltonian  $H_0$  with the dipole-dipole interaction can be written as

$$H_0 = \begin{pmatrix} -\omega_0 & 0 & 0 & 0 \\ 0 & -\Delta & \beta & 0 \\ 0 & \beta & \Delta & 0 \\ 0 & 0 & 0 & \omega_0 \end{pmatrix} \quad (1)$$

Where  $\omega_0 = (\omega_1 + \omega_2)/2$  and  $\Delta = (\omega_2 - \omega_1)/2$ . By diagonalizing the nondiagonal Hamiltonian  $H_0$ , four collective (Dicke) states can be given by <sup>[1,2]</sup>

$$\begin{aligned} |G\rangle &= |S_{c0}S_{p0}\rangle \\ |S\rangle &= \alpha|S_{c0}S_{p1}\rangle + \gamma|S_{c1}S_{p0}\rangle \\ |A\rangle &= \alpha|S_{c1}S_{p0}\rangle - \gamma|S_{c0}S_{p1}\rangle \\ |E\rangle &= |S_{c1}S_{p1}\rangle \end{aligned} \quad (2)$$

Where the corresponding eigenvalues are  $E_G = -\omega_0$ ,  $E_S = w$ ,  $E_A = -w$ , and  $E_E = \omega_0$ , where  $\alpha = \frac{r}{\sqrt{r^2 + \beta^2}}$ ,

$\gamma = \frac{r}{\sqrt{r^2 + \beta^2}}$ ,  $w = \sqrt{\Delta^2 + \beta^2}$ , and  $r = \Delta + \sqrt{\Delta^2 + \beta^2}$ . From Eq. (2), we can obtain

$$\begin{aligned} |S_{c0}S_{p0}\rangle &= |G\rangle \\ |S_{c1}S_{p0}\rangle &= \alpha|A\rangle + \gamma|S\rangle \\ |S_{c0}S_{p1}\rangle &= \alpha|S\rangle - \gamma|A\rangle \\ |S_{c1}S_{p1}\rangle &= |E\rangle \end{aligned}$$

(3)

The interaction Hamiltonian between molecules and field reads

$$H_c(t) = -\varepsilon(t)\mu_c(|S_{c1}S_{p0}\rangle\langle S_{c0}S_{p0}| + |S_{c0}S_{p1}\rangle\langle S_{c1}S_{p1}|) - \varepsilon(t)\mu_p(|S_{c0}S_{p1}\rangle\langle S_{c0}S_{p0}| + |S_{c1}S_{p0}\rangle\langle S_{c1}S_{p1}|) + h.c.$$

(4)

By inserting Eq. (3) into Eq. (4), we can rewrite the interaction Hamiltonian in the basis of the four collective states,

$$H_c(t) = -\varepsilon(t) \begin{pmatrix} 0 & \mu_c\alpha - \mu_p\gamma & \mu_c\gamma + \mu_p\alpha & 0 \\ \mu_c\alpha - \mu_p\gamma & 0 & 0 & \mu_p\alpha - \mu_c\gamma \\ \mu_c\gamma + \mu_p\alpha & 0 & 0 & \mu_c\alpha + \mu_p\gamma \\ 0 & \mu_p\alpha - \mu_c\gamma & \mu_c\alpha + \mu_p\gamma & 0 \end{pmatrix}$$

(5)

From Eq. (5), we can see that the effective transition dipole moments of the transition between states  $|G\rangle(|E\rangle)$  and  $|S\rangle(|A\rangle)$  are

$$\mu_{GS} = \mu_c \gamma + \mu_p \alpha$$

$$\mu_{GA} = \mu_c \alpha - \mu_p \gamma$$

$$\mu_{ES} = \mu_c \alpha + \mu_p \gamma$$

$$\mu_{EA} = \mu_p \alpha - \mu_c \gamma$$

## References

[1] Z. Ficek, R. Tanas, Entangled states and collective nonclassical effects in two-atom systems, *Phys. Rep.*, **2002**, 372, 369-443.

[2] Y. Guo, X. B. Luo, S. Ma, C.-C. Shu, All-optical generation of quantum entangled states with strictly constrained ultrafast laser pulses, *Phys. Rev. A*, **2019**, 100, 023409.
